# Supplementary material for: Priming of hippocampal microglia by IFN-γ/STAT1 pathway impairs social memory in mice
Source: Research Square preprint supplement (doi:10.21203/rs.3.rs-3404246/v1), 2023-10-09
Supplement: Supplementary file 1 [file 6a5ea5a10ca70cb44b6cdf24.docx]

**Supplementary Table**

**Supplementary Table 1. Genes primers used for real time PCR analyses**

| **Gene** | **Primer sequences** |
| --- | --- |
| *β-actin* | Forward: 5’-CCGTGAAAAGATGACCCAGATC-3’  Reverse: 5’-CACAGCCTGGATGGCTACGT-3’ |
| *Cd11b* | Forward: 5’- AAACCACAGTCCCGCAGAGA-3’  Reverse: 5’- CGTGTTCACCAGCTGGCTTA-3’ |
| *Cd11c* | Forward: 5’- CCTGAGGGTGGGCTGGAT-3’  Reverse: 5’- GCCAATTTCCTCCGGACAT-3’ |
| *Cd74* | Forward: 5’- AGCCAGATGCGGATGGCTA-3’  Reverse: 5’- TCCTGGGTCATGTTGCCGTA-3’ |
| *Cd86* | Forward: 5- ATATGACCGTTGTGTGTGTTCTGGA-3’  Reverse: 5’- AGGGCCACAGTAACTGAAGCTGTAA-3’ |
| *Cd68* | Forward: 5’-CCACAGGCAGCACAGTGGACA-3’  Reverse: 5’-TCCACAGCAGAAGCTTTGGCCC-3’ |
| *Cd47* | Forward: 5’-TGCGGTTCAGCTCAACTACTG-3’  Reverse: 5’-GCTTTGCGCCTCCACATTAC-3’ |
| *Sirpα* | Forward: 5’- ACCCAGATCCAGGACACAA-3’  Reverse: 5’- GTGGACCATGTCCAGGTCA-3’ |
| *Il-33* | Forward: 5’- TCCTTGCTTGGCAGTATCCA-3’  Reverse: 5’- TGCTCAATGTGTCAACAGACG -3’ |
| *Il-33r* | Forward: 5’- AGACCTGTTACCTGGGCAAG-3’  Reverse: 5’- CACCTGTCTTCTGCTATTCTGG-3’ |
| *Cx3cr1* | Forward: 5’-CAGCATCGACCGGTACCTT- 3’  Reverse: 5’-GCTGCACTGTCCGGTTGTT -3’ |
| *Cx3cl1* | Forward: 5’-ATTGGAAGACCTTGCTTTGG-3’  Reverse: 5’-GCCTCGGAAGTTGAGAGAGA-3’ |
| *Cd200* | Forward: 5’-GGGCATGGCAGCAGTAGCG-3’  Reverse: 5’- TGTGCAGCGCCTTTCTTTC-3’ |
| *Cd200R* | Forward: 5’-AGGAGGATGAAATGCAGCCTTA-3’  Reverse: 5’- TGCCTCCACCTTAGTCACAGTATC -3’ |
| *Tnf-α* | Forward:5’-TACTGAACTTCGGGGTGATTGGTCC-3’  Reverse: 5’-CAGCCTTGTCCCTTGAAGAGAACC-3’ |
| *Il-1β* | Forward: 5’-CCAGCAGGTTATCATCATCATCC-3’  Reverse: 5’-CTCGCAGCAGCACATCAAC-3’ |
| *IL-6* | Forward: 5’- ACCGCTATGAAGTTCCTCTC- 3’  Reverse: 5’- CTCTGTGAAGTCTCCTCTCC-3’ |
| *iNOS* | Forward:5’- ACAACAGGAACCTACCAGCTCA-3’  Reverse: 5’- GATGTTGTAGCGCTGTGTGTCA-3’ |
| *IL-10* | Forward: 5’- TGGCCCAGAAATCAAGGAGC-3’  Reverse: 5’- CAGCAGACTCAATACACACT-3’ |
| *MCR1* | Forward: 5’- CAGCAGACTCAATACACACT-3’  Reverse: 5’- ACTACTACCTGAGCCCACACCTGCT-3’ |
| *Arg-1* | Forward: 5’- AGACAGCAGAGGAGGTGAAGAG- 3’  Reverse: 5’- CGAAGCAAGCCAAGGTTAAAGC-3’ |
| *BDNF* | Forward: 5’-GAGCTGAGCGTGTGTGACAG-3’  Reverse: 5’-CGCCAGCCAATTCTCTTTTTGC-3’ |
| *IGF-1* | Forward: 5’-GGTGGTTTATGAATGGTT-3’  Reverse: 5’-AGGGTGTGTCTAATGGAG-3’ |
